# Supplementary material for: The Suitability of Stool Antigen Testing in the Detection of Helicobacter pylori in a Regional and Rural Area of Australia
Source: Hindawi journal article supplement (doi:10.1155/2023/6642474), 2023-10-20
Supplement: f1 [file 6642474.f1.docx]

# Supplementary Appendix

**Appendix A.** Commercially available non-invasive H. pylori detection tests used in this study.

|  | **ELISA LIAISON® Meridian**1 | **Immulite® 2000 system**2 | **PYtest®**3 |
| --- | --- | --- | --- |
| **Test type** | Monoclonal SAT | Serology IgG antibodies | UBT |
| **Sample type** | Stool | Blood (serum) | Exhaled breath + ingested C-14 |
| **Test preparation** | Cessation antibiotic + PPI 2 weeks pre-test | N/A | Cessation antibiotic 1 month + PPI 1 week pre-test,  4-6 hours fasting pre-test |
| **Sample collection** | Self-collection | Venepuncture | PYtest® C-14 capsule ingestion + breath collection |
| **Detection range** | <0.01 to >75 index | 0.4 to 8 U/ml | <1 to >6000 DPM |
| **Negative result** | <0.9 index | <0.9 U/ml | <50 DPM |
| **Equivocal result** | ≥0.9 and <1.1 index | ≥0.9 and <1.1 U/ml | ≥50 and <200 DPM |
| **Positive result** | ≥1.1 index | ≥1.1 U/ml | ≥200 DPM |
| **Sensitivity** | 98.6% (95%CI 95.9-99.7%) | 97.0% (95%CI 89.6-99.6%) | Study 1: 96% (95%CI 87-100%)  Study 2: 82% (95%CI 62-94%) |
| **Specificity** | 95.5% (95%CI 87.5-99.1%) | 100% (95%CI 95.7-100%) | Study 1: 88% (95%CI 81-96%)  Study 2: 96% (95%CI 86-100%) |

Test type, sample type/collection, test preparation, test detection range as well as negative, equivocal, and positive result thresholds has been included for each non-invasive test. Further test specific information is accessible from the listed reference. PPI = Proton pump inhibitor, DPM = Disintegrations per minute.

## References

1. *LIAISON® Meridian H. pylori SA*. EN – 53759 ed. DiaSorin Inc.; 2020.

2. *Immulite® 2000 H. pylori IgG*. PIL2KHPG – 23 ed. Siemens Healthcare; 2018.

3. *PYtest®: The urea breath test kit for detecting Helicobacter pylori*. PI1.8.1 ed. Tri-med Distributors PTY LTD; 2020.
